# Supplementary material for: Synthesis of xanthohumol and xanthohumol-d3 from naringenin
Source: Royal Society of Chemistry journal article supplement (doi:10.1039/d1ra05443k), 2021-01-01

## Supplementary Data for **Synthesis of xanthohumol and xanthohumol-d<sub>3</sub> from naringenin**

Joanna Andrusiak<sup>a,b</sup>, Kinga Mylkie<sup>c,d</sup>, Małgorzata Wysocka<sup>b</sup>, Andrzej Wolan<sup>a,b</sup>, Jacek Ścianowski<sup>a</sup>,  
Marcin Budny<sup>b</sup>

<sup>a</sup> Department of Organic Chemistry, Faculty of Chemistry, Nicolaus Copernicus University, Gagarina 7, 87-100 Toruń, Poland; <sup>b</sup> Synthex Technologies Sp. z o.o., Gagarina 7/134B, 87-100 Toruń, Poland; <sup>c</sup> Department of Biomedical and Polymer Chemistry, Faculty of Chemistry, Nicolaus Copernicus University, Gagarina 7, 87-100 Toruń; <sup>d</sup> Noctiluca S.A., ul. Kościuszki 71/208; 87-100 Toruń, Polska

### Contents

|                                                      |   |
|------------------------------------------------------|---|
| Supplementary Data for .....                         | 1 |
| The MRM transitions of <b>1a</b> and <b>1b</b> ..... | 2 |
| Stable isotope dilution assays .....                 | 2 |
| Calibration curves .....                             | 3 |
| Typical MS chromatogram for calibration points ..... | 4 |
| Typical MS chromatogram for beer sample .....        | 4 |
| <sup>1</sup> H and <sup>13</sup> C NMR spectra ..... | 4 |

## The MRM transitions of **1a** and **1b**

Table S1. Details of the MRM transitions of **1a** and **1b**

| Compound  | Ionization mode | Precursor ion | Product ion  | Q1 [V] <sup>a</sup> | CE [eV] <sup>b</sup> | Q3 [V] <sup>c</sup> |
|-----------|-----------------|---------------|--------------|---------------------|----------------------|---------------------|
| <b>1a</b> | ESI(+)          | <b>355.0</b>  | <b>178.9</b> | <b>-17.0</b>        | <b>-27.0</b>         | <b>-29.0</b>        |
|           |                 |               | <b>299.0</b> | <b>-17.0</b>        | <b>-13.0</b>         | <b>-29.0</b>        |
|           |                 |               | 113.0        | -17.0               | -48.0                | -16.0               |
|           |                 |               | 150.9        | -17.0               | -44.0                | -24.0               |
|           |                 |               | 93.0         | -17.0               | -55.0                | -29.0               |
|           | ESI(-)          | 353.0         | 119.1        | 18.0                | 27.0                 | 21.0                |
|           |                 |               | 233.0        | 18.0                | 19.0                 | 23.0                |
|           |                 |               | 295.1        | 18.0                | 29.0                 | 27.0                |
|           |                 |               | 218.2        | 18.0                | 25.0                 | 21.0                |
|           |                 |               | 175.0        | 18.0                | 40.0                 | 28.0                |
| <b>1b</b> | ESI(+)          | <b>358.0</b>  | <b>182.0</b> | <b>-26.0</b>        | <b>-25.0</b>         | <b>-30.0</b>        |
|           |                 |               | <b>302.0</b> | <b>-26.0</b>        | <b>-13.0</b>         | <b>-29.0</b>        |
|           |                 |               | 115.9        | -26.0               | -49.0                | -18.0               |
|           |                 |               | 107.9        | -26.0               | -55.0                | -16.0               |
|           |                 |               | 154.0        | -26.0               | -45.0                | -25.0               |
|           | ESI(-)          | 356.0         | 119.1        | 10.0                | 29.0                 | 21.0                |
|           |                 |               | 236.0        | 10.0                | 19.0                 | 23.0                |
|           |                 |               | 295.2        | 10.0                | 28.0                 | 27.0                |
|           |                 |               | 175.0        | 10.0                | 39.0                 | 30.0                |
|           |                 |               | 218.1        | 10.0                | 25.0                 | 21.0                |
|           |                 | 168.2         | 10.0         | 28.0                | 30.0                 |                     |

<sup>a</sup> voltage on 1<sup>st</sup> quadrupole; <sup>b</sup> collision energy; <sup>c</sup> voltage on 3<sup>rd</sup> quadrupole; highlighted transitions were used for preparation of analytical HPLC-MS method

## Stable isotope dilution assays

Stable isotope dilution assays were performed for two polish beers (Beer #1, Beer#2). A freshly opened beer was degassed for 30 min in ultrasonic cleaner. Then, to aliquots (1.0 mL) of degassed beer, samples of standard solution (**1b**, C = 5.720 mg/L) were added (0.1 mL, 0.2 mL, 0.3 mL, 0.4 mL, 0.5 mL). Prepared in such way samples together with beer samples were analyzed by HPLC-MS in MRM mode (Column: XB-C18, 100×3.0 mm, 2.6 μm, 100 Å; flow: 0.55 mL/min; oven: 35 °C; gradient MeOH/0.1% HCO<sub>2</sub>H<sub>(aq)</sub>: from 50% MeOH to 95% MeOH). Plots of peak areas versus standard concentrations in samples were sketched and concentration of **1a** was determined from the plot as absolute value of zero point.

Table S2. Stable isotope dilution assays

| Analysis       | Standard volume [mL] | Std. conc. in sample [mg/L] | Peak area                              |
|----------------|----------------------|-----------------------------|----------------------------------------|
| <b>Beer #1</b> |                      |                             | <b>Xanthohumol conc. [mg/L] 0.4069</b> |
| 1              | 0.0                  | 0                           | 952552                                 |
| 2              | 0.1                  | 0.520                       | 2342036                                |
| 3              | 0.2                  | 0.953                       | 3518620                                |
| 4              | 0.3                  | 1.320                       | 4319572                                |
| 5              | 0.4                  | 1.634                       | 4839326                                |
| 6              | 0.5                  | 1.907                       | 5883749                                |
| <b>Beer #2</b> |                      |                             | <b>Xanthohumol conc. [mg/L] 0.5488</b> |
| 1              | 0.0                  | 0                           | 1512201                                |
| 2              | 0.1                  | 0.520                       | 3008853                                |
| 3              | 0.2                  | 0.953                       | 4244305                                |
| 4              | 0.3                  | 1.320                       | 5208824                                |
| 5              | 0.4                  | 1.634                       | 6137508                                |
| 6              | 0.5                  | 1.907                       | 6853290                                |

Calibration curves

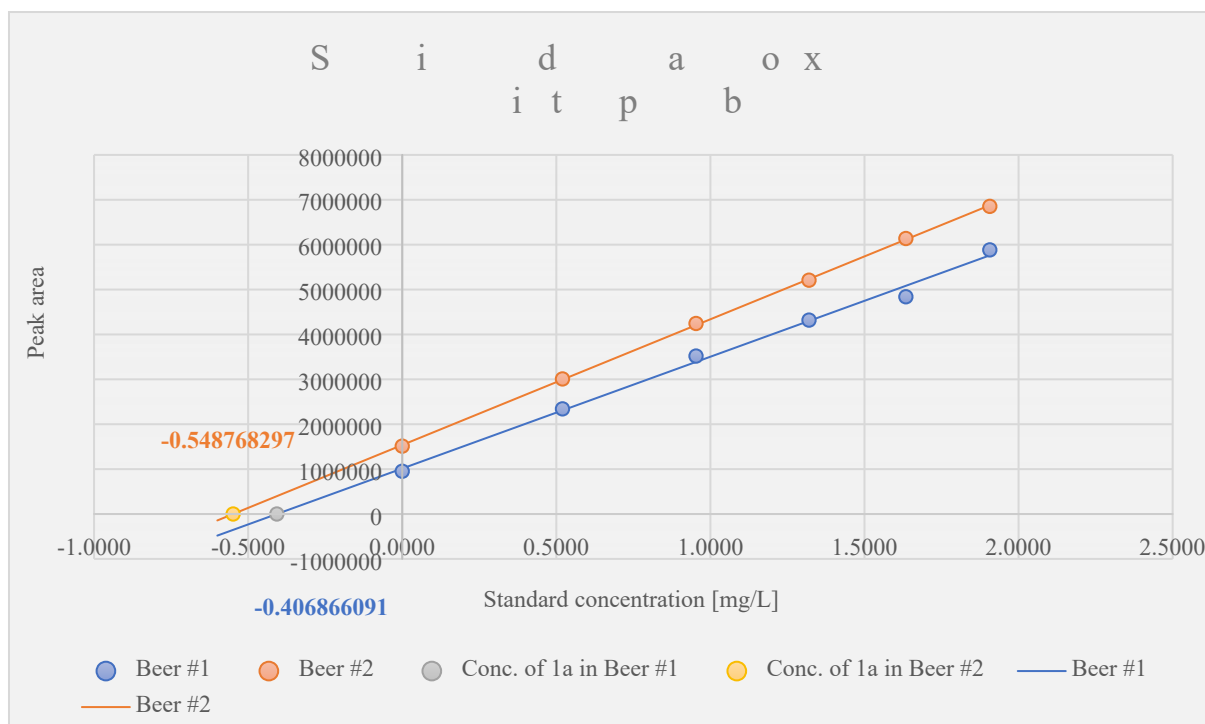

### Typical MS chromatogram for calibration points

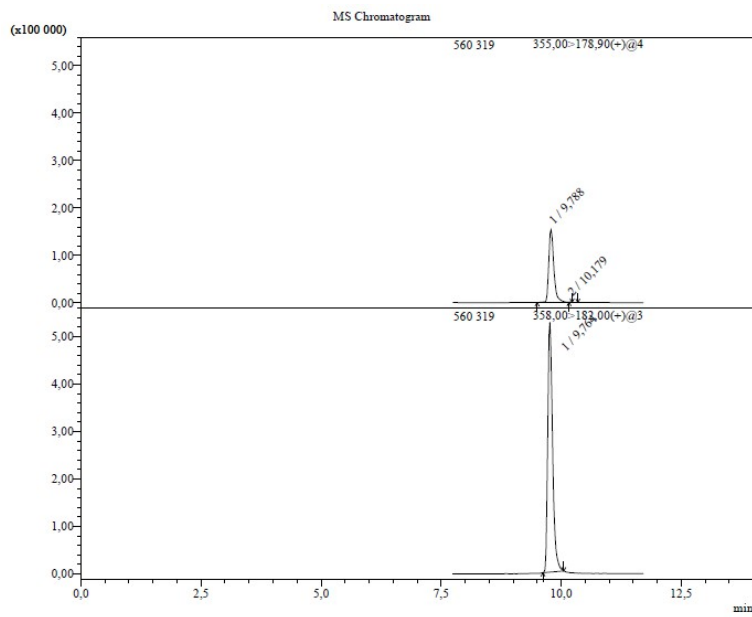

### Typical MS chromatogram for beer sample

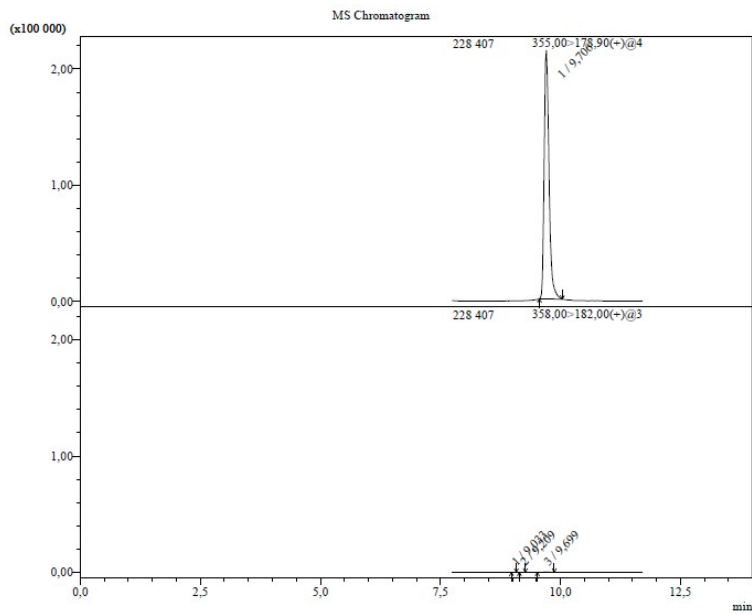

### $^1\text{H}$ and $^{13}\text{C}$ NMR spectra

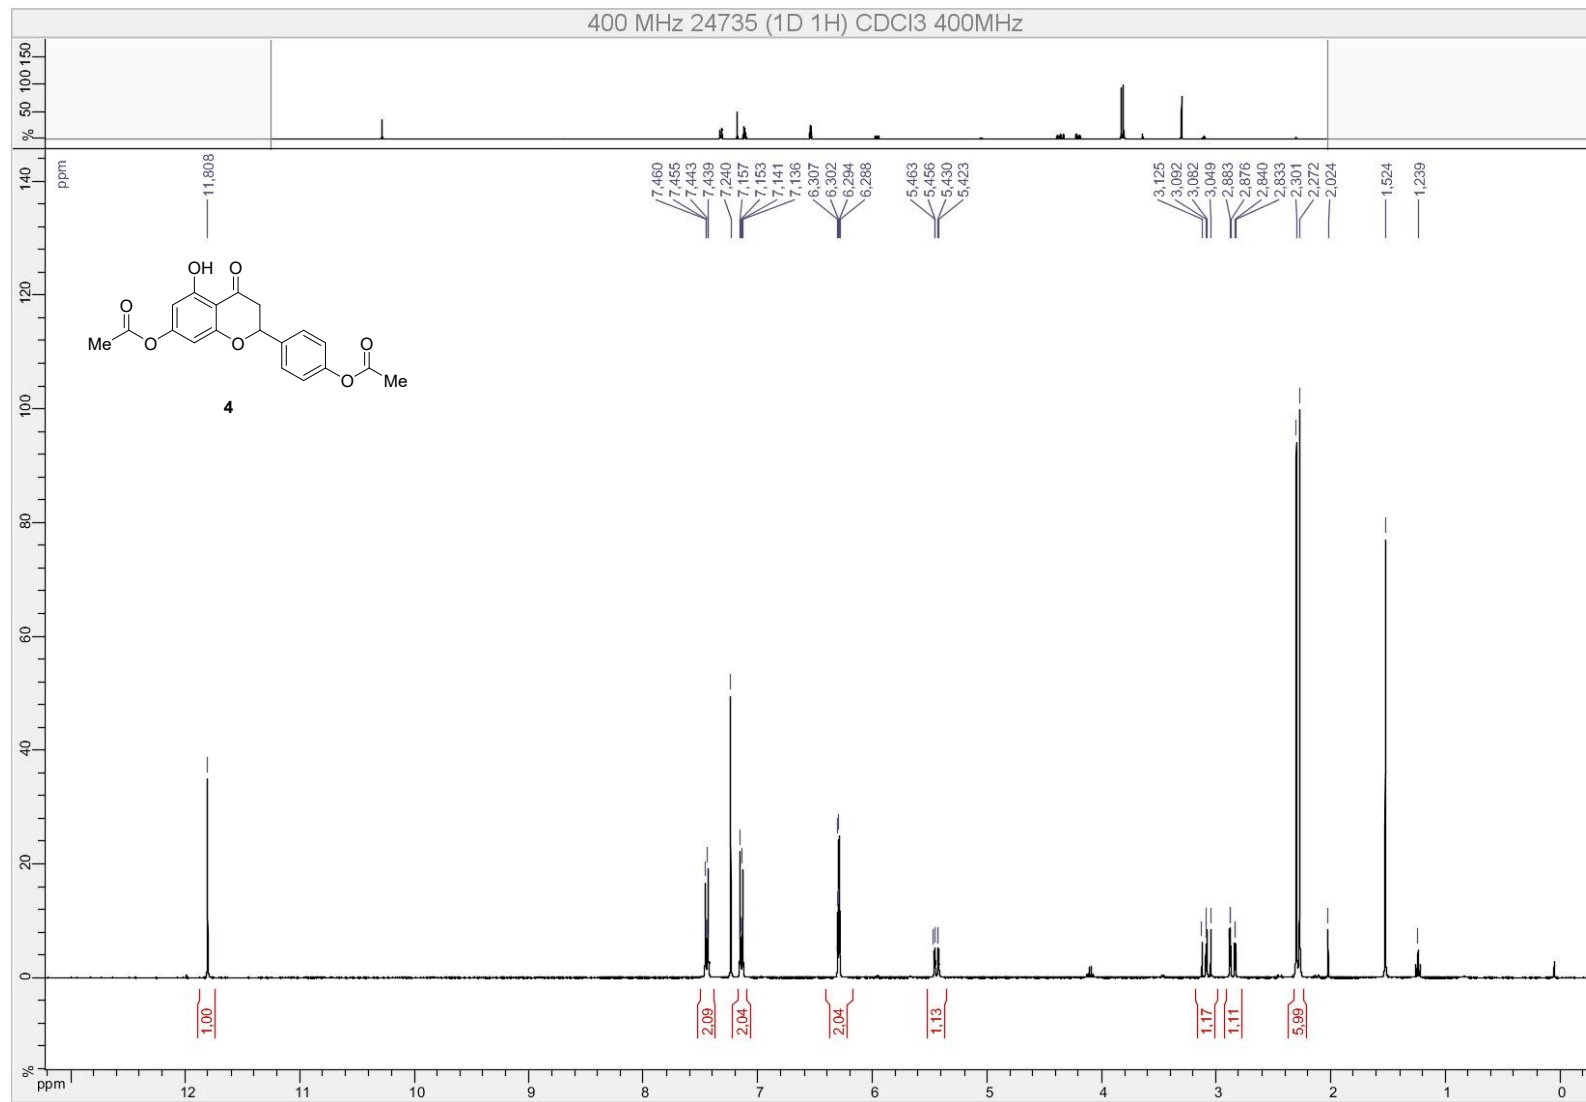

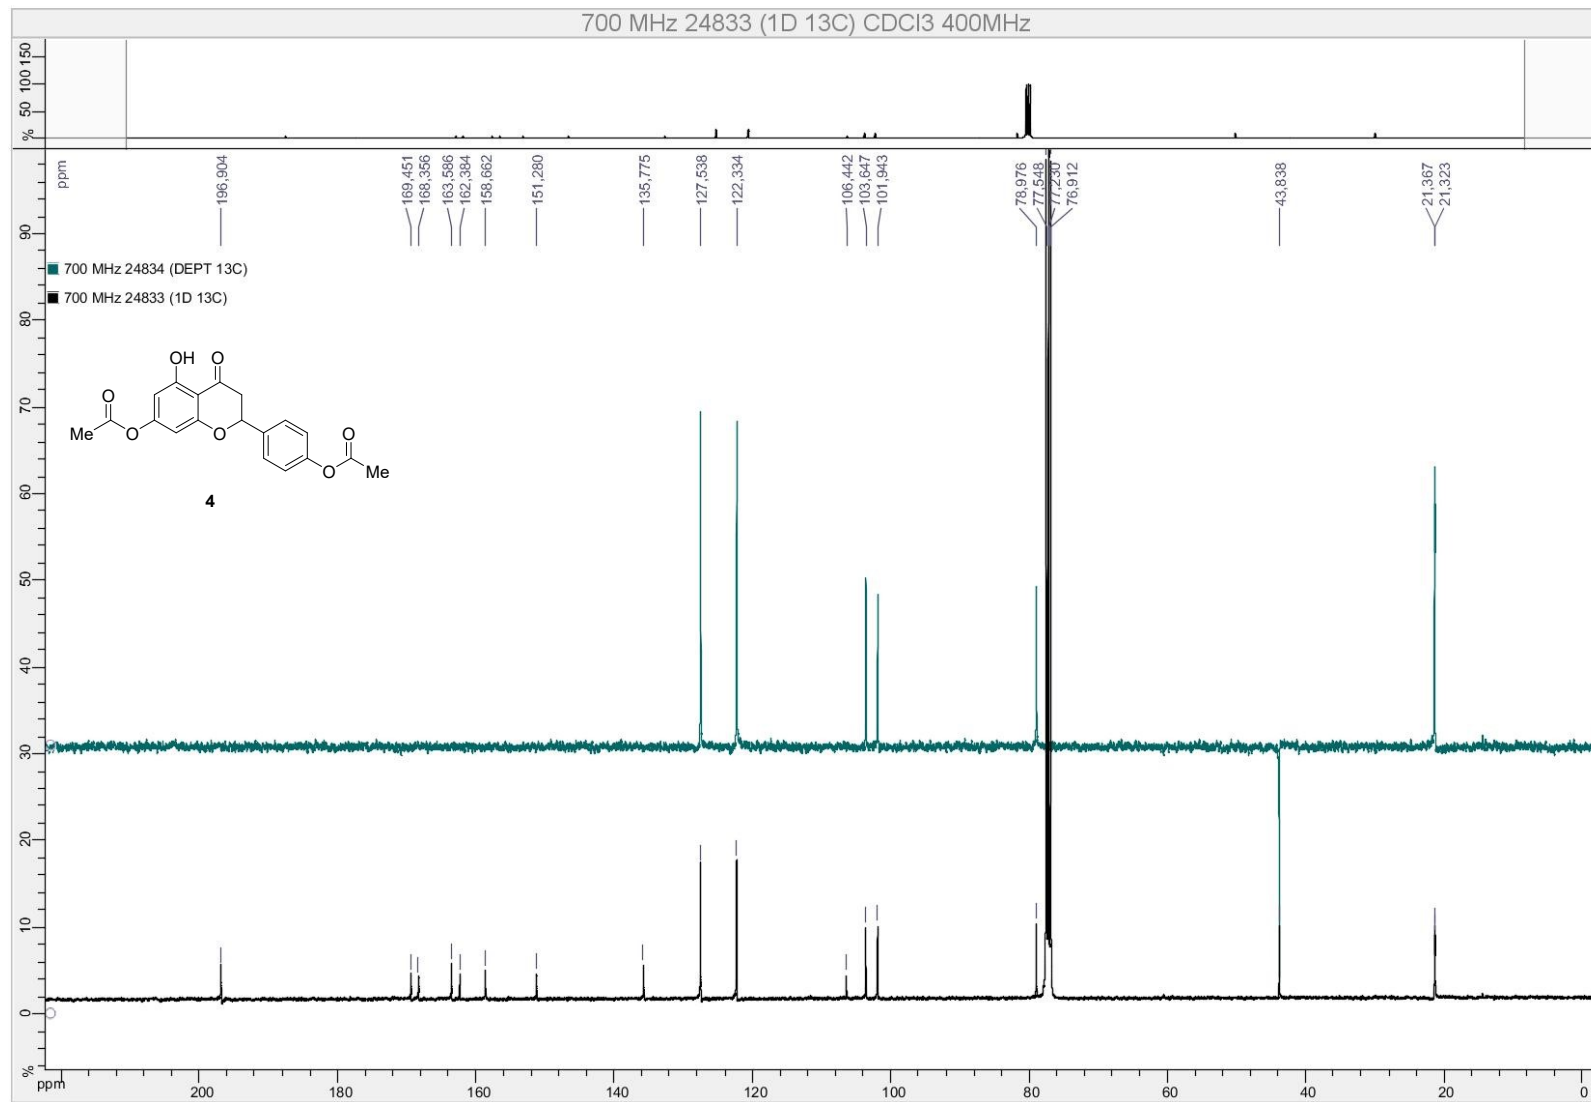

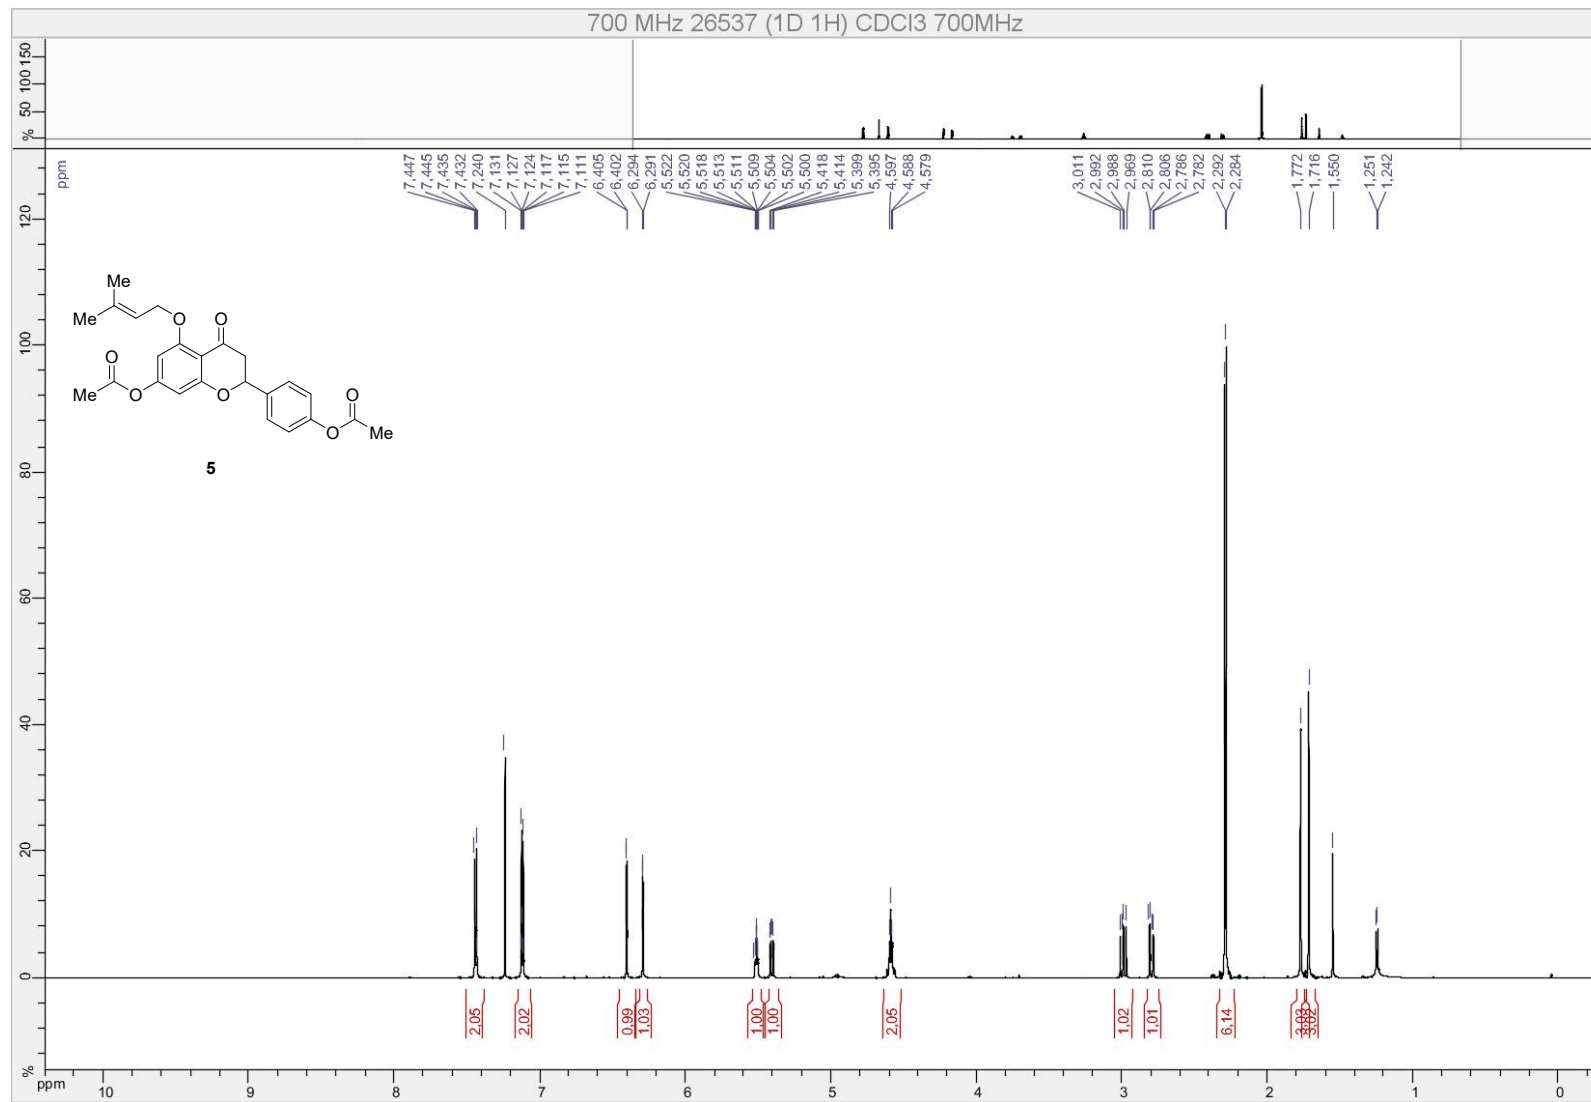

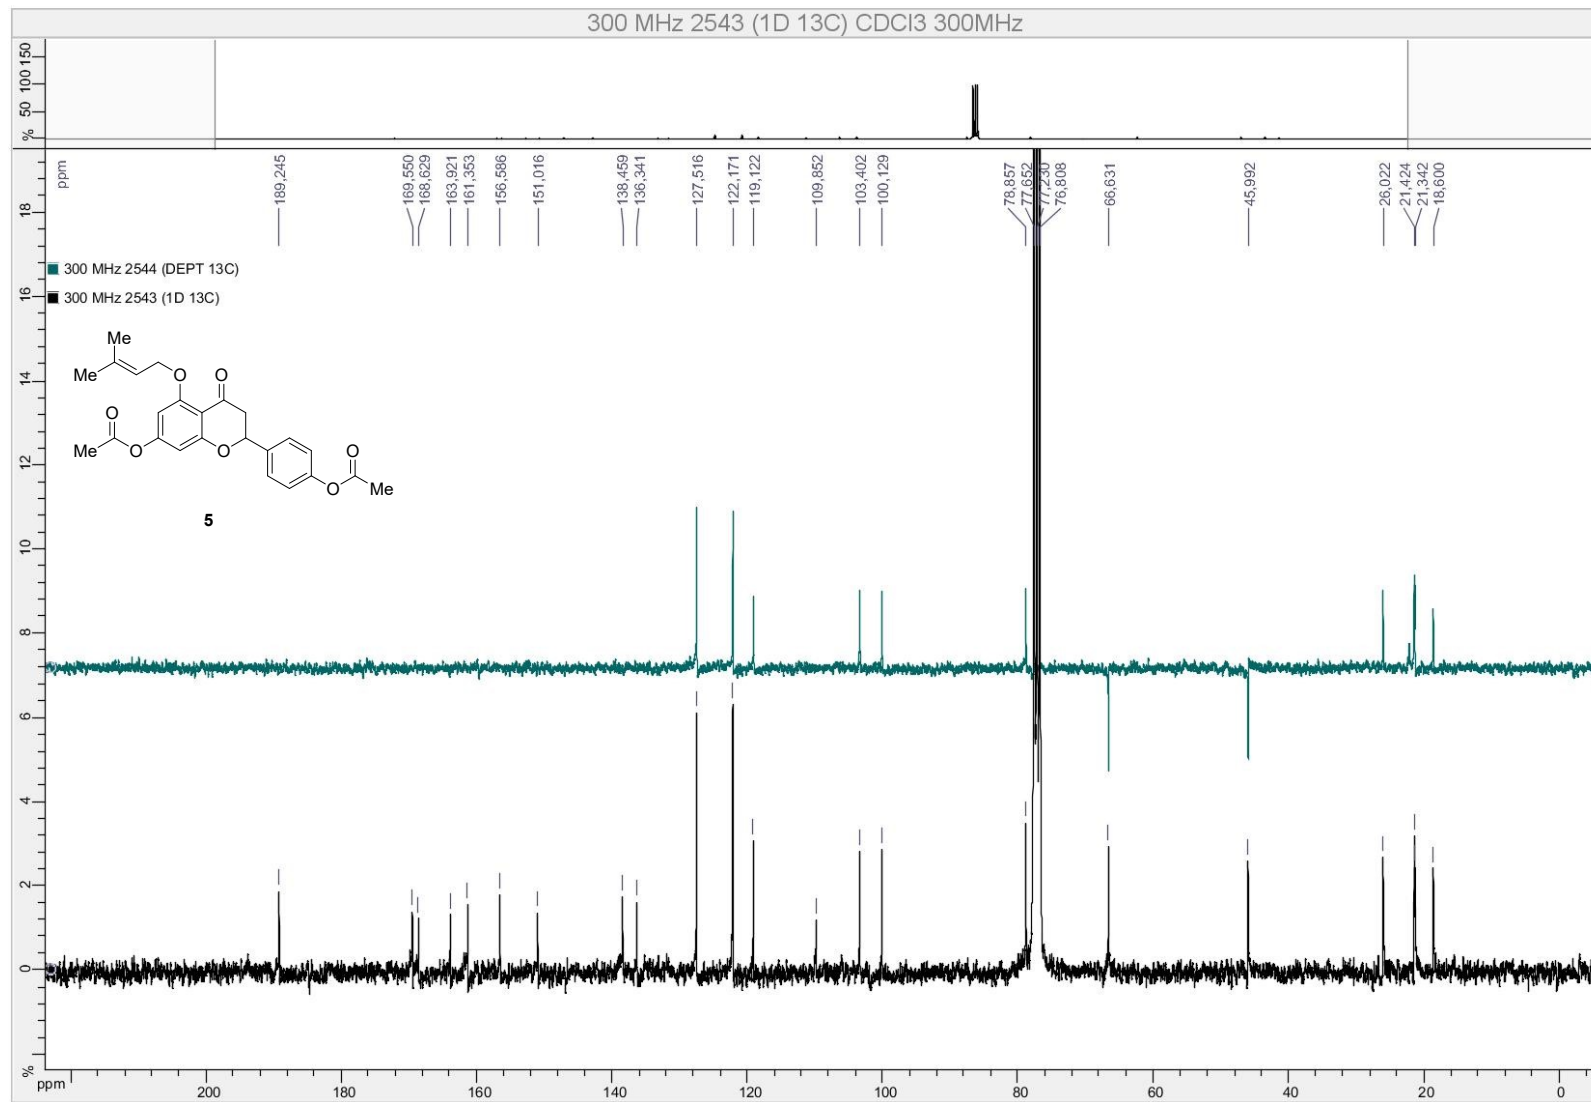



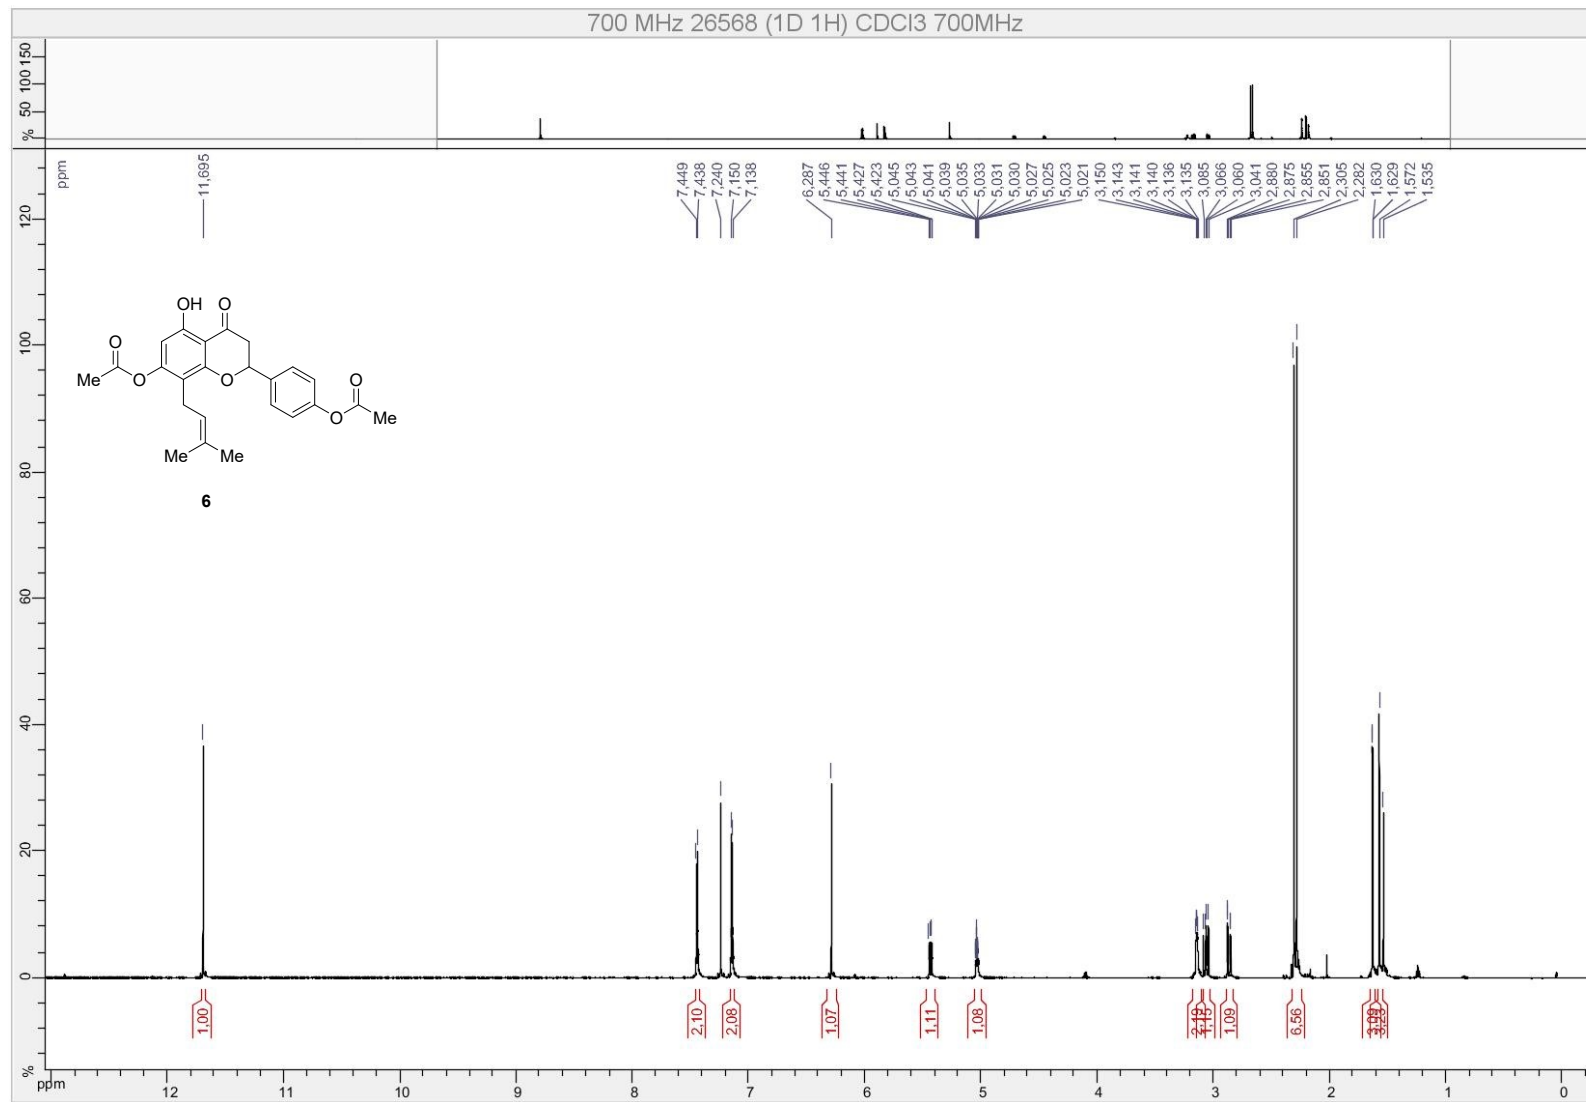

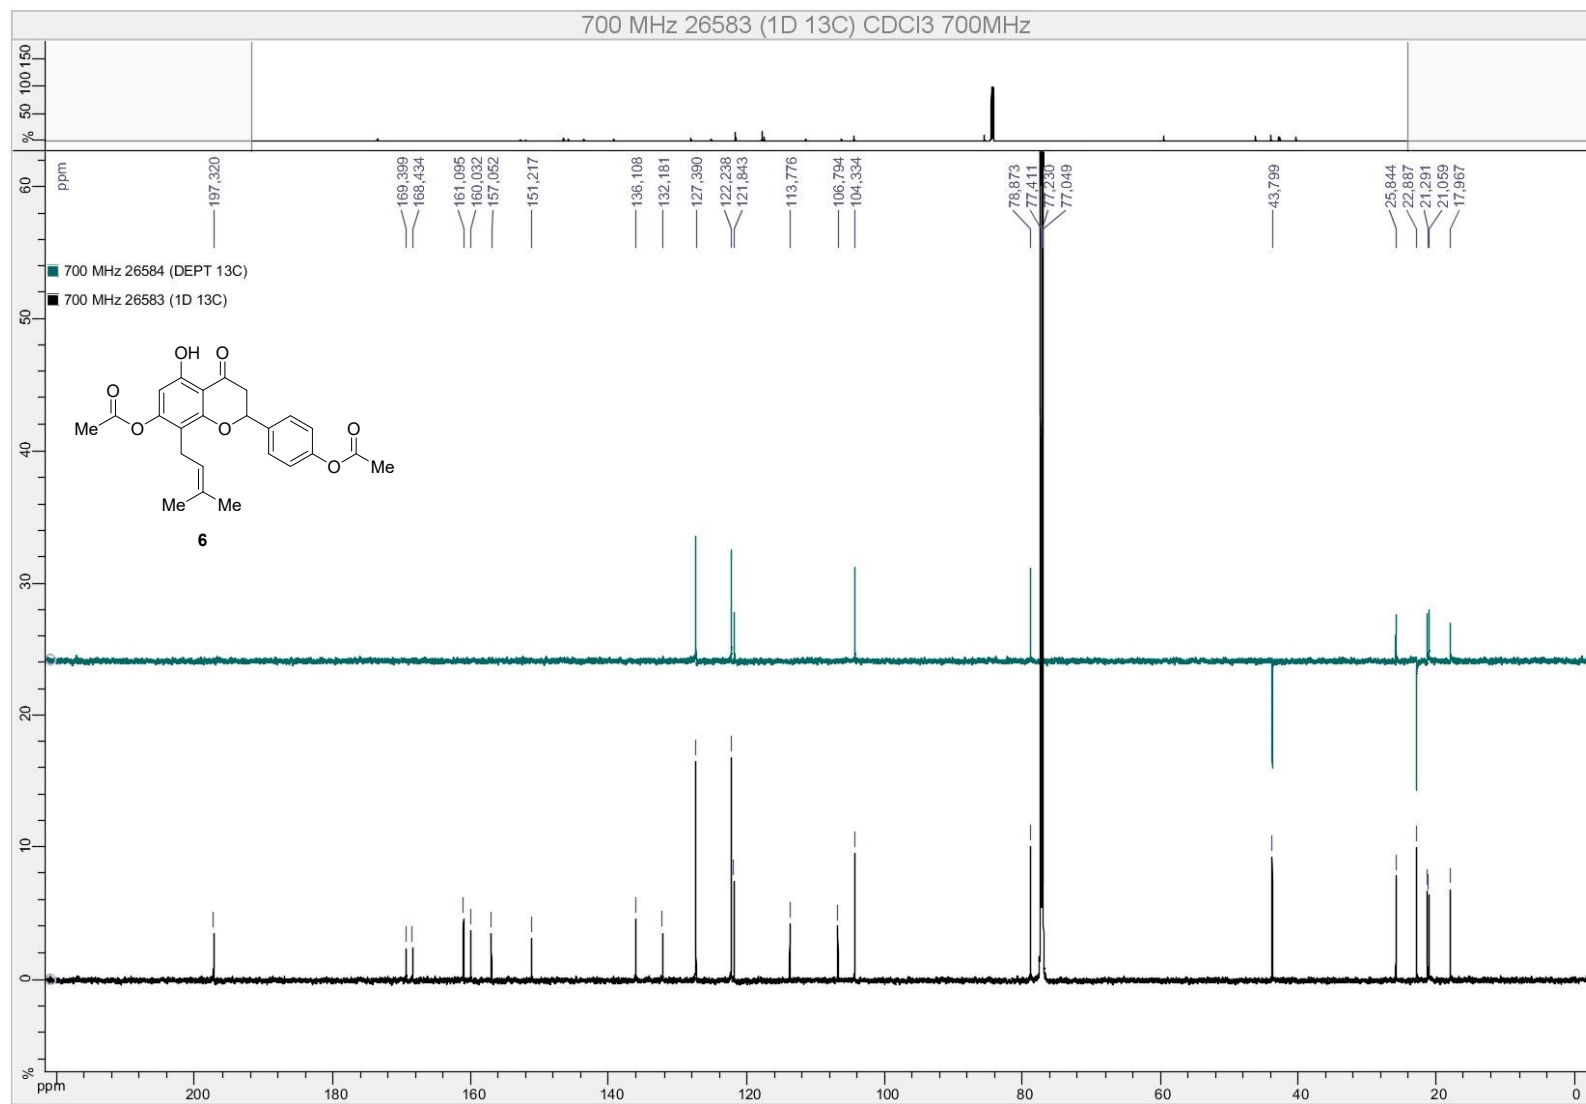

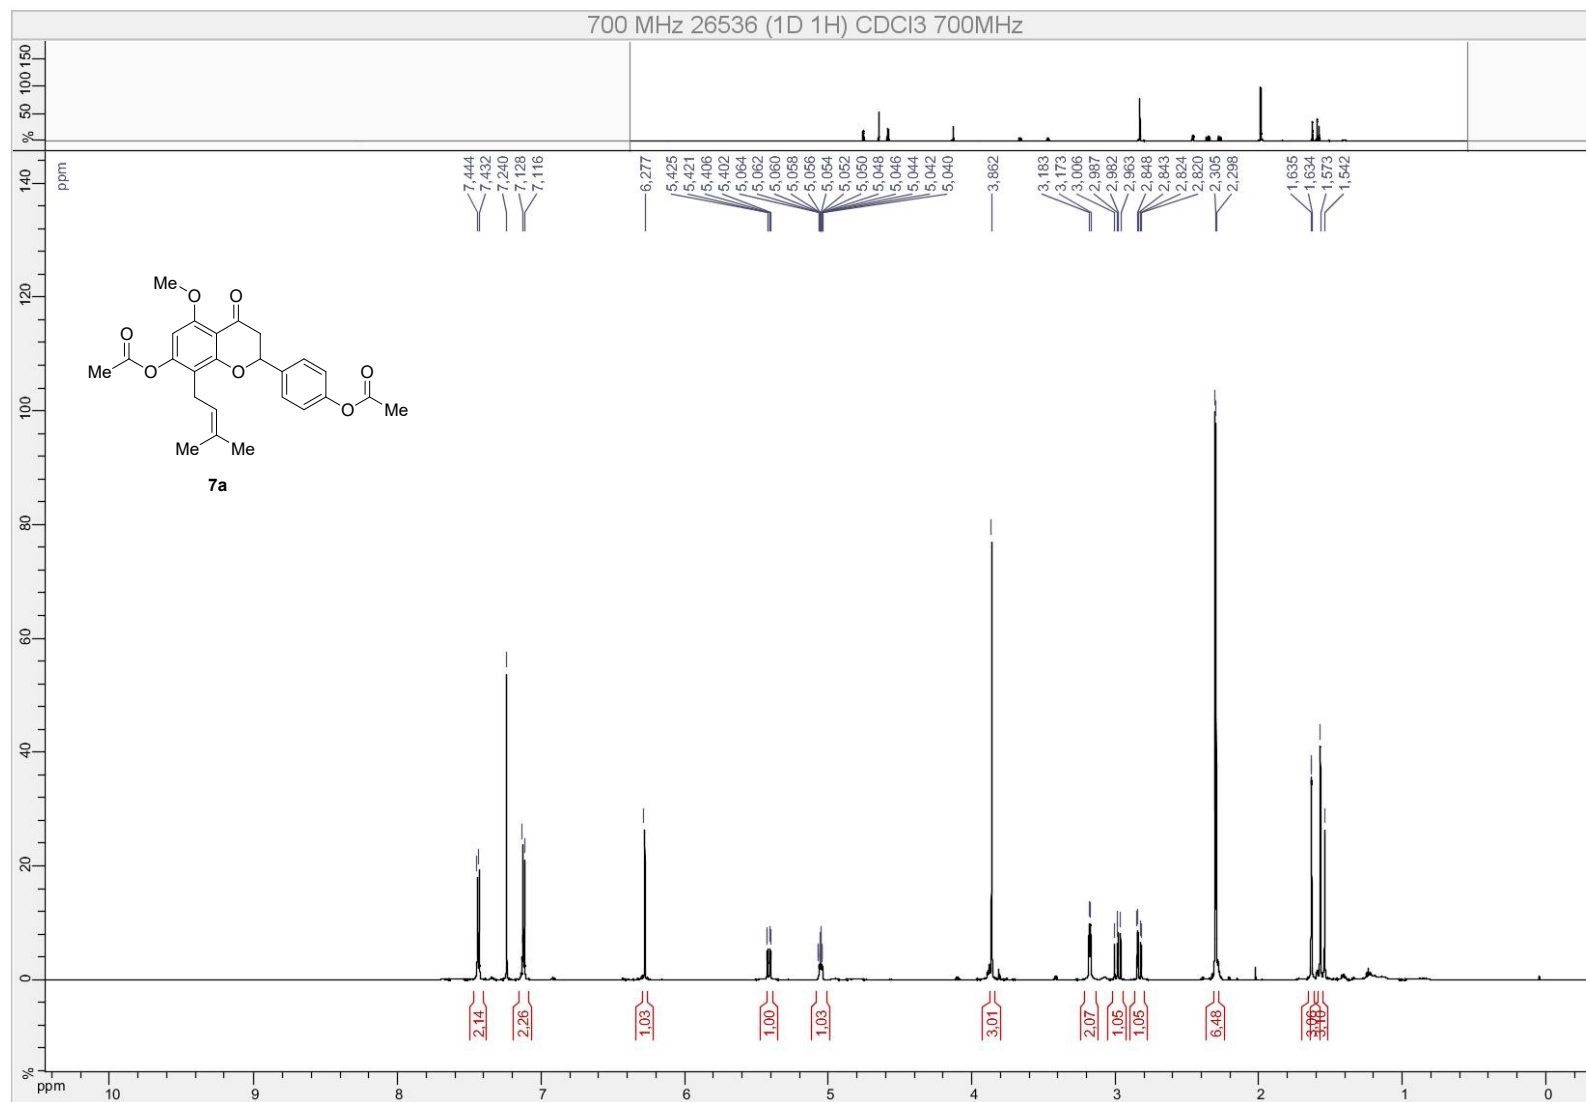

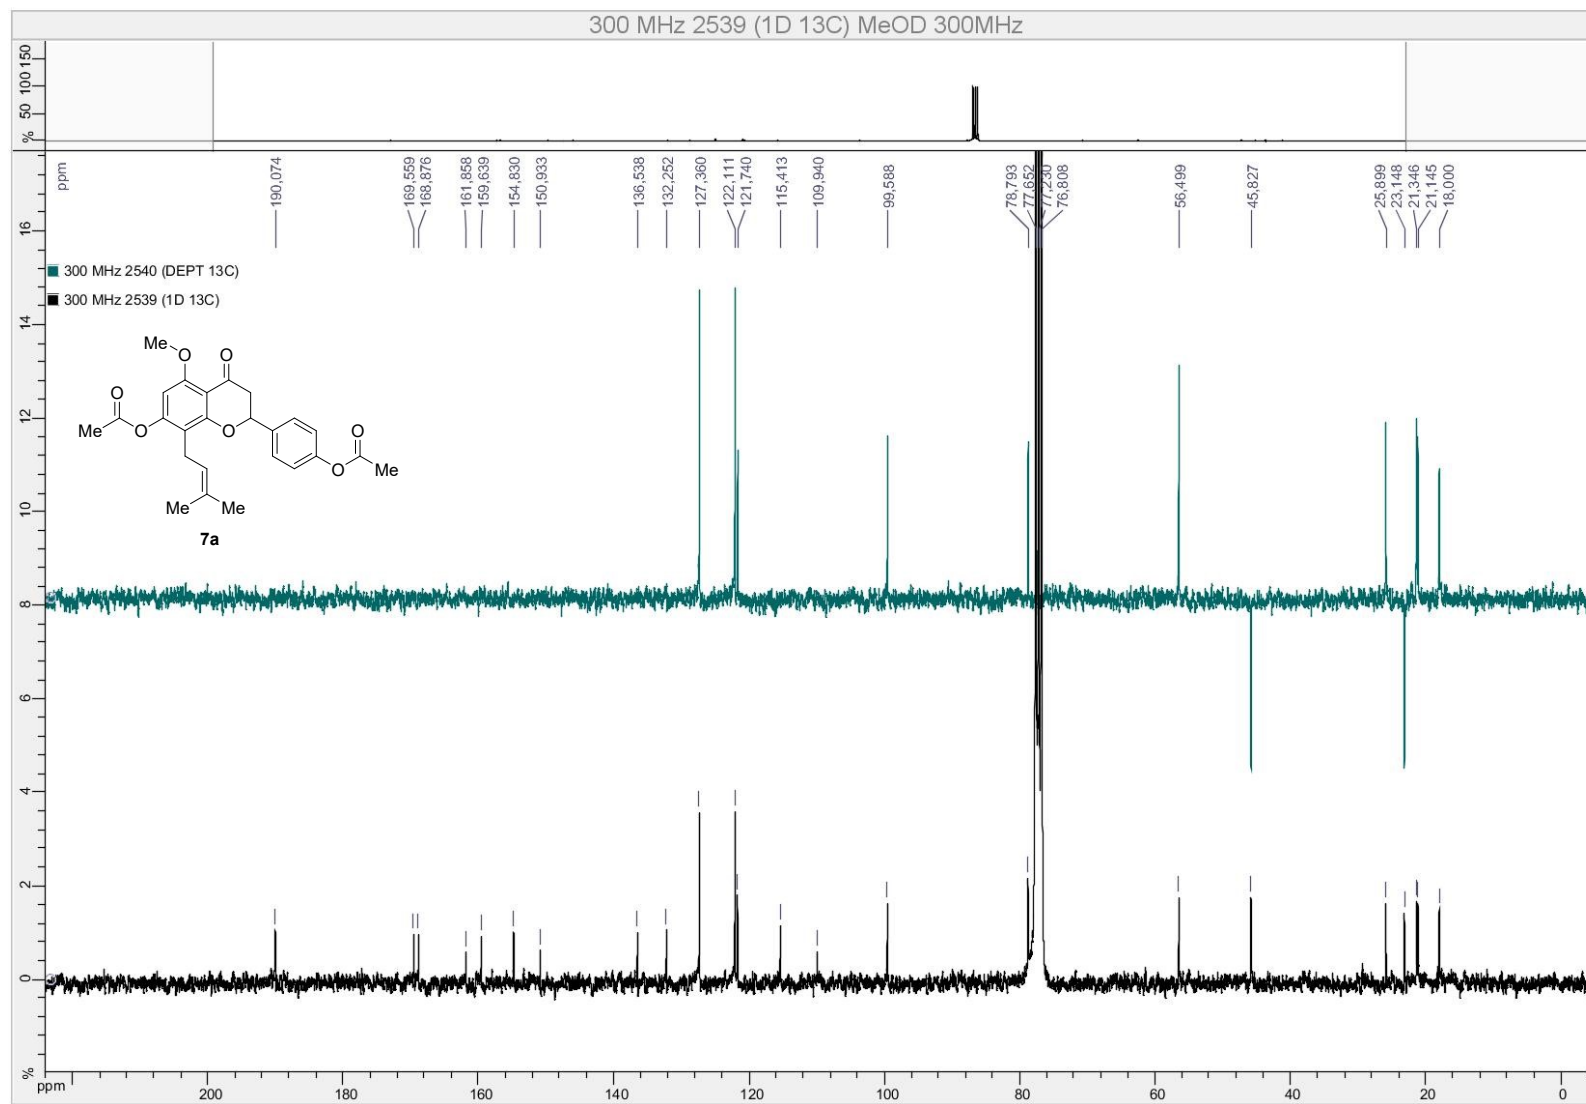

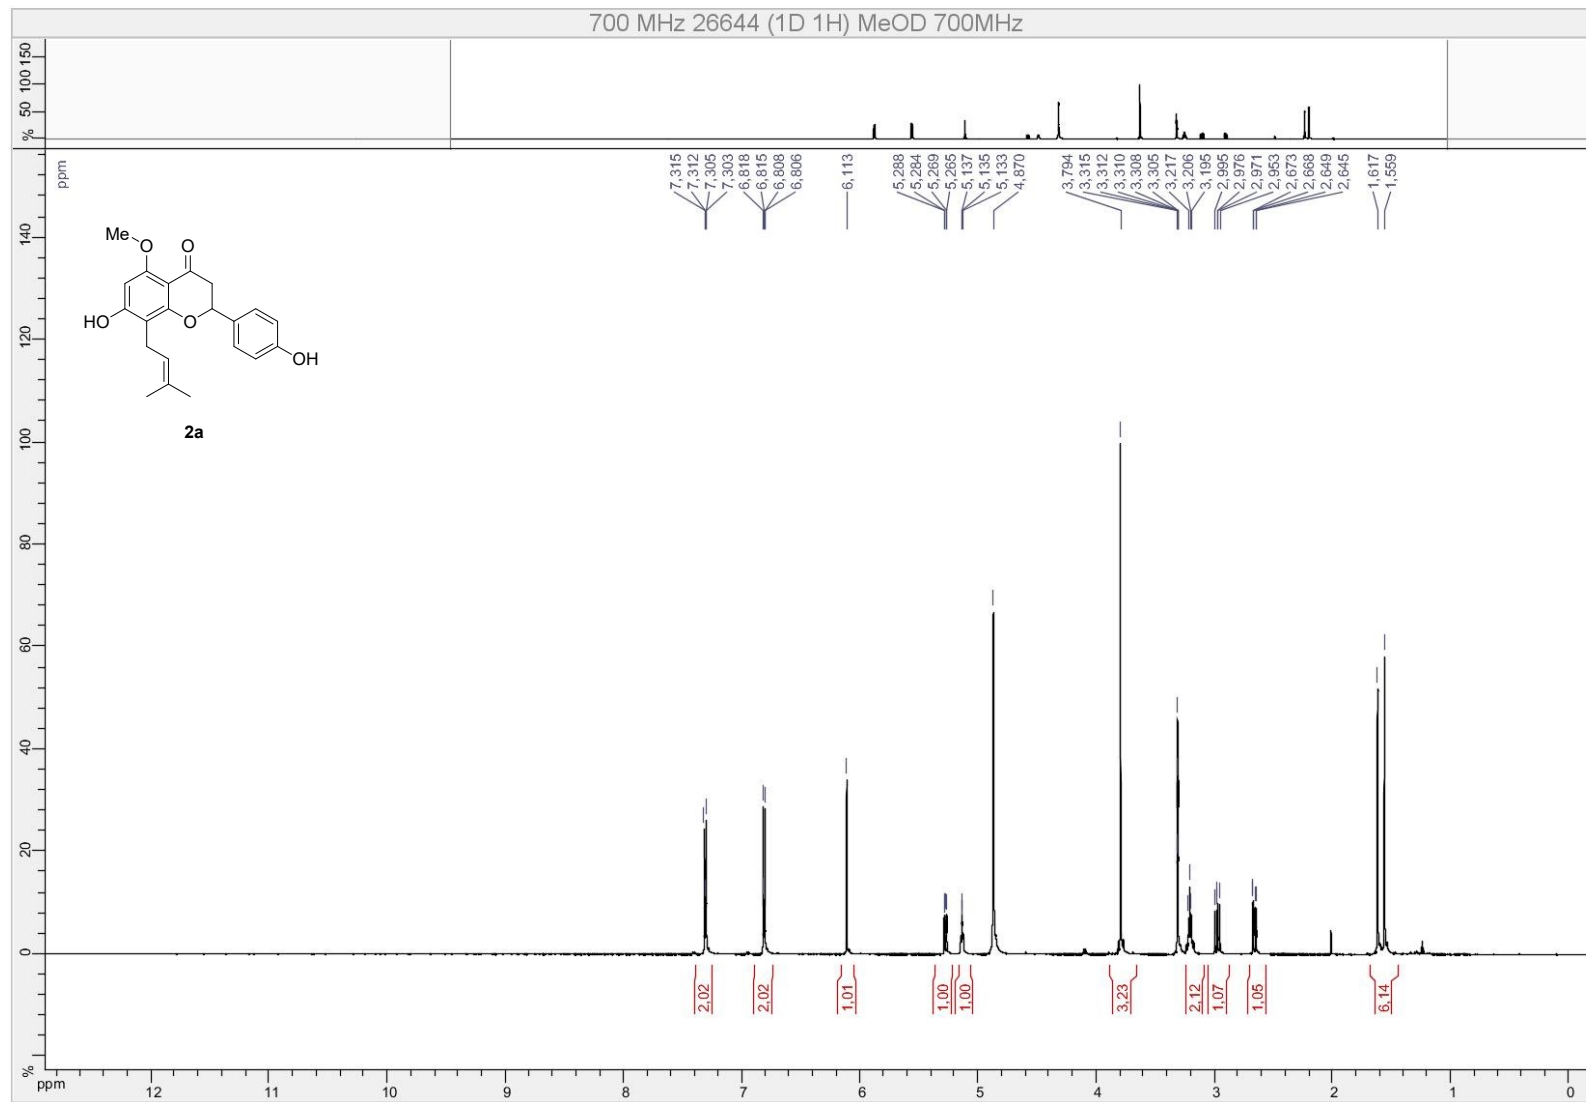

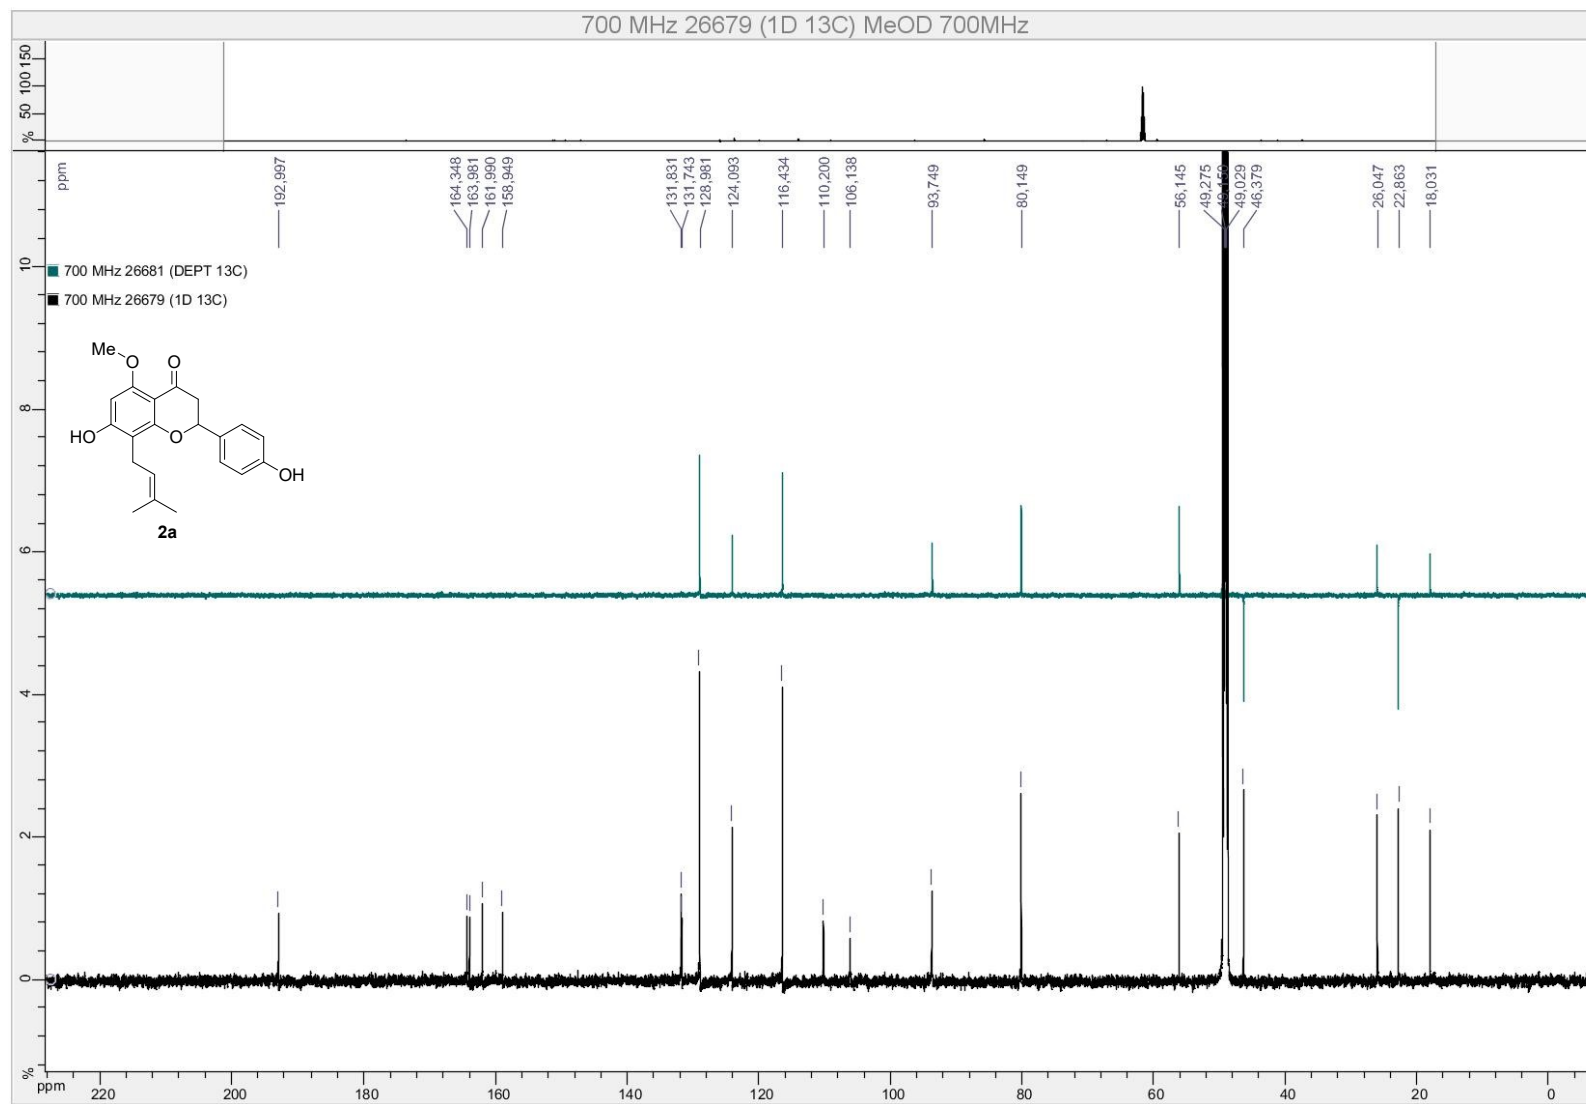

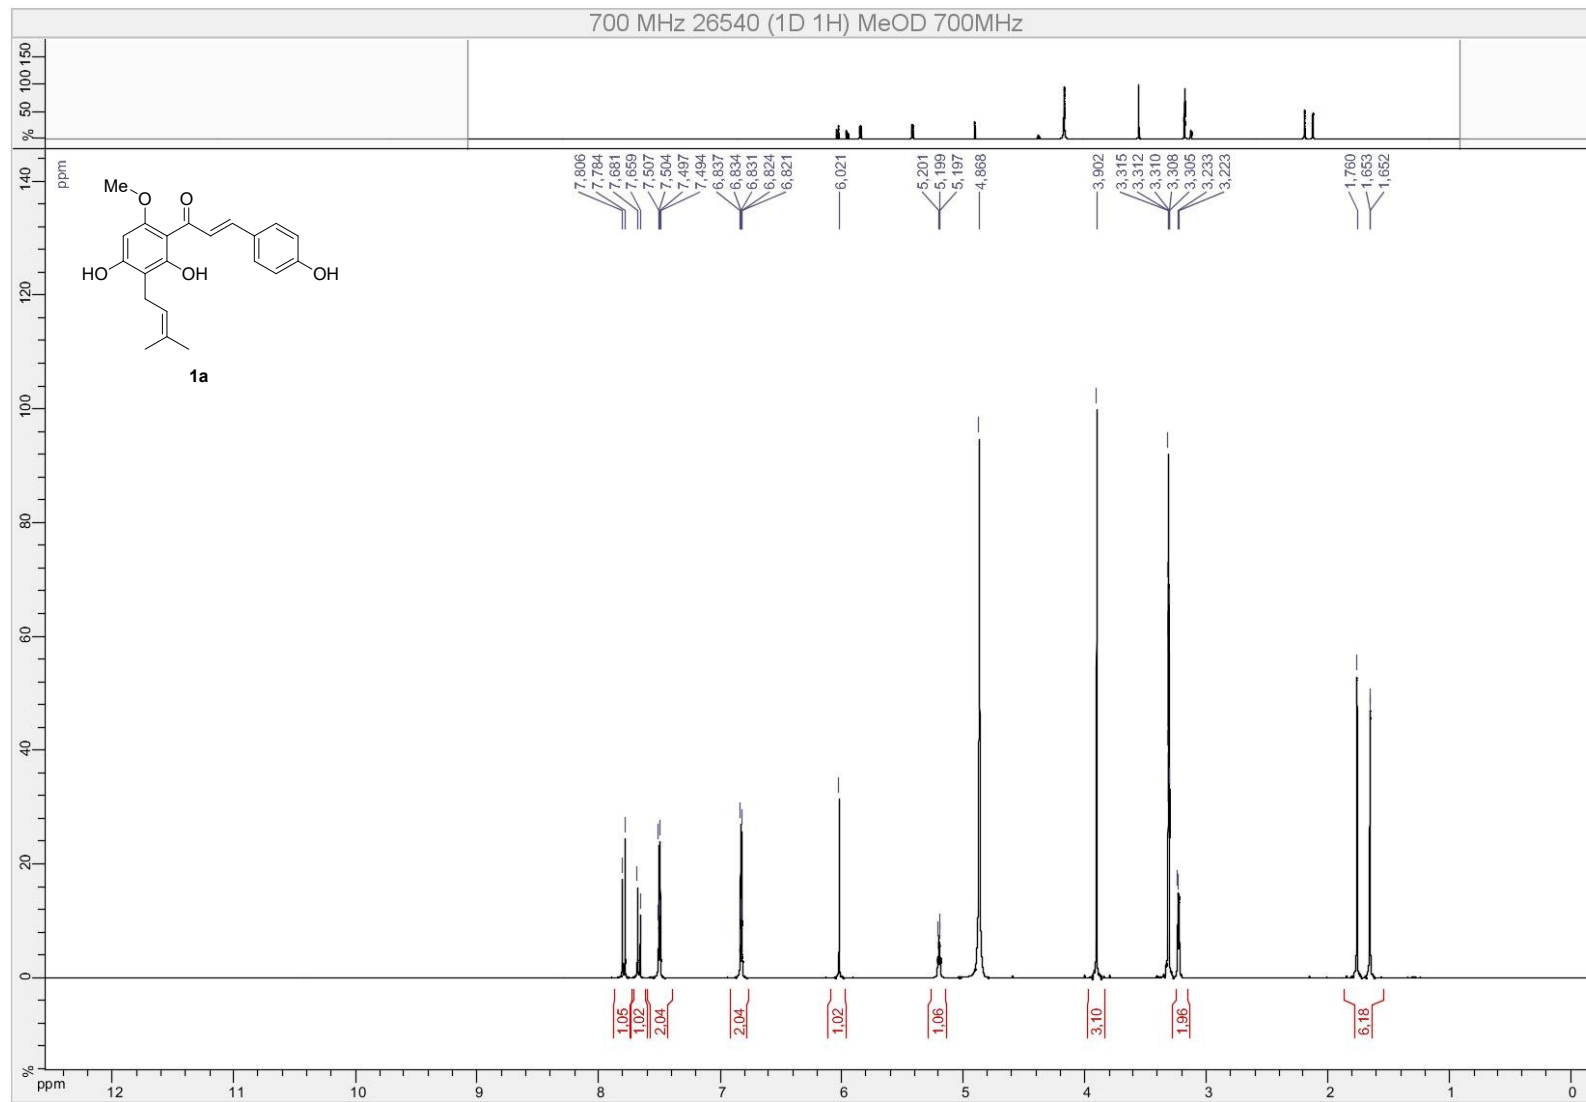

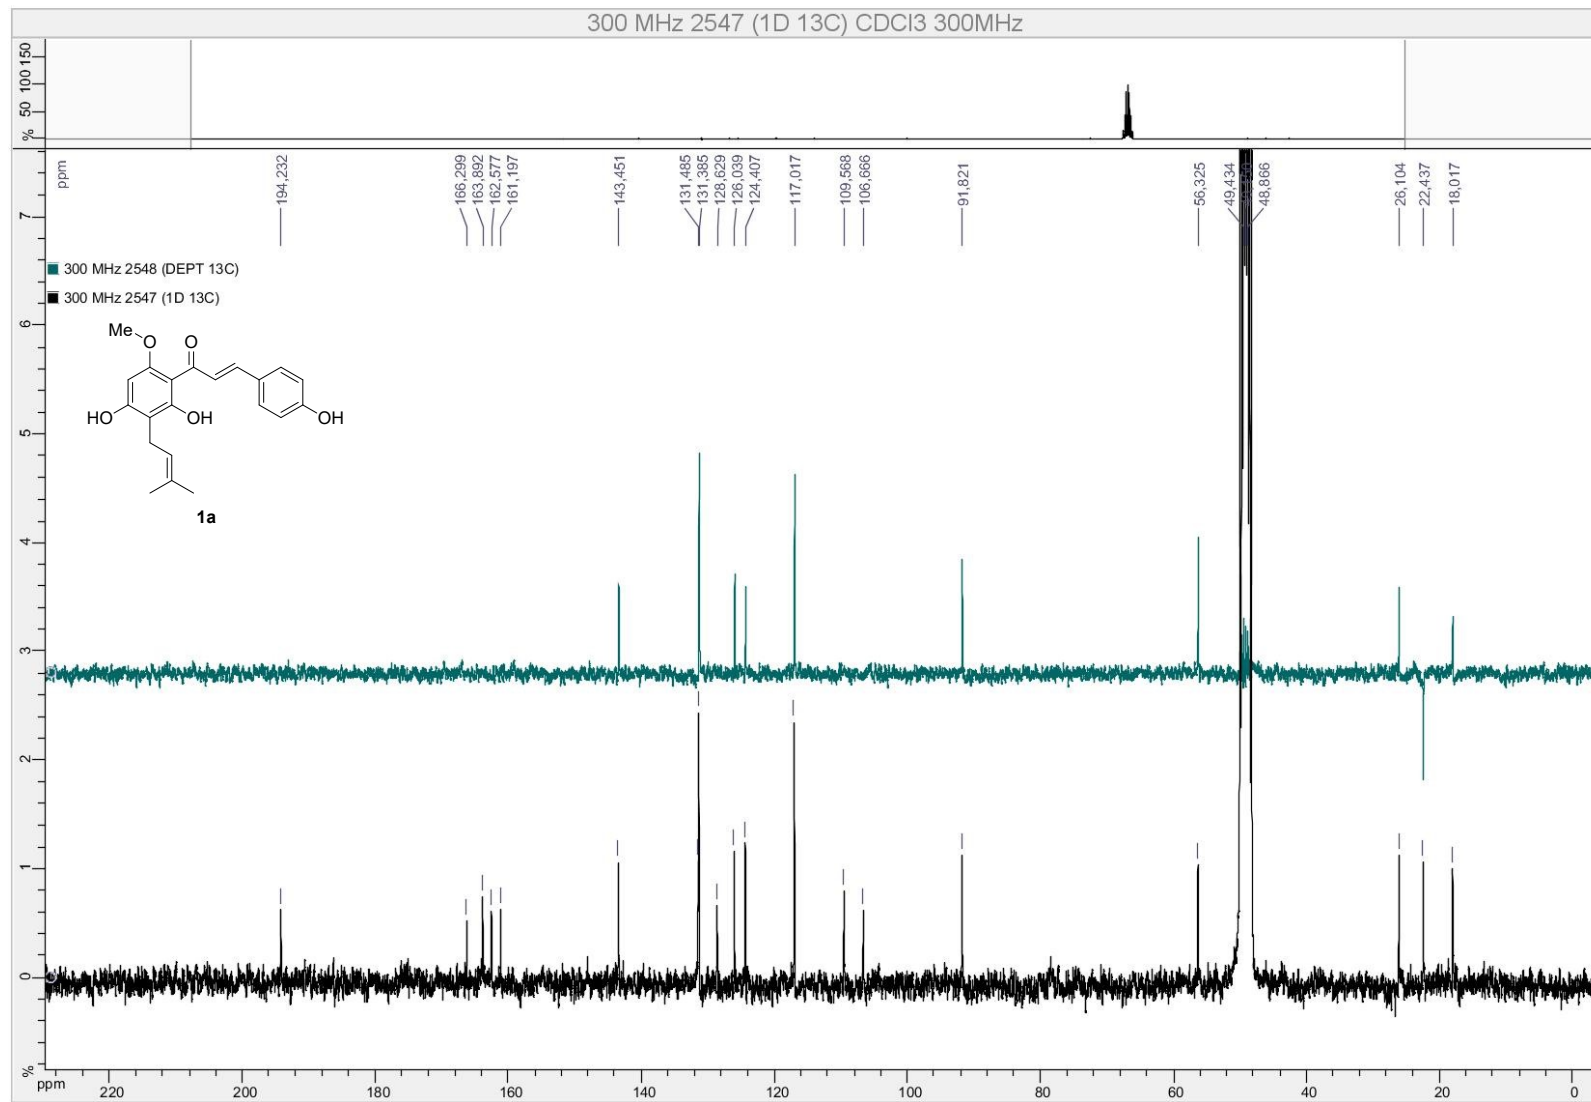



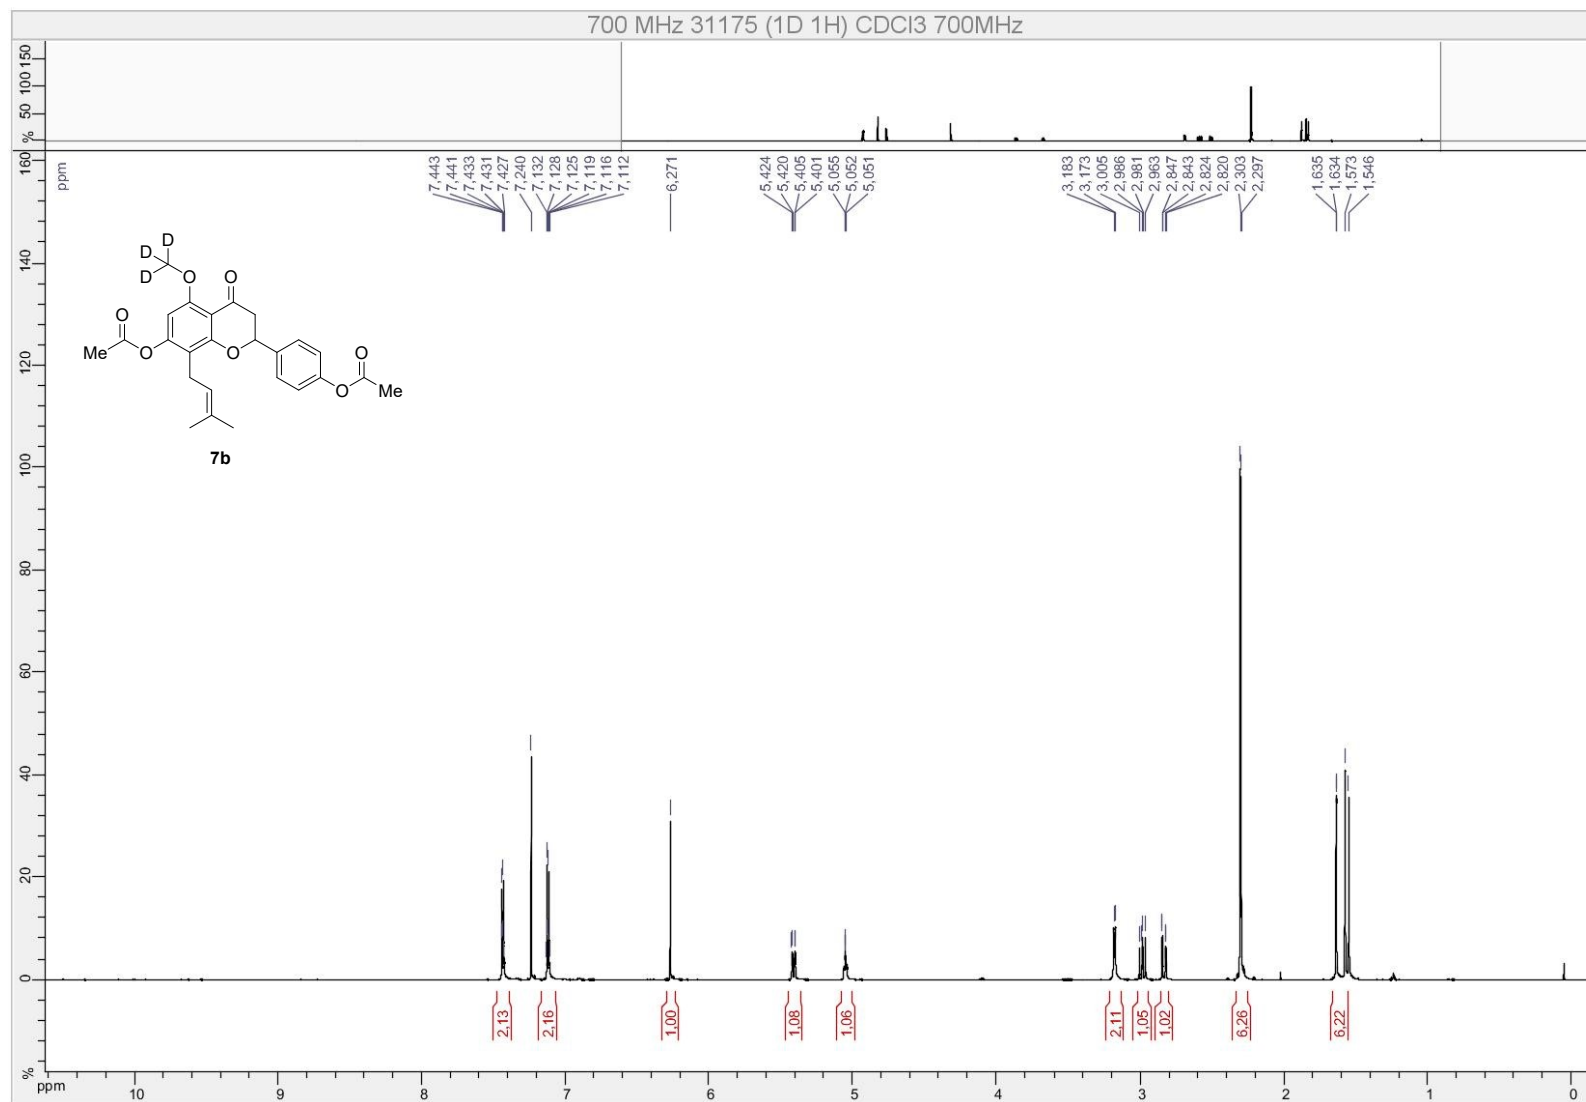

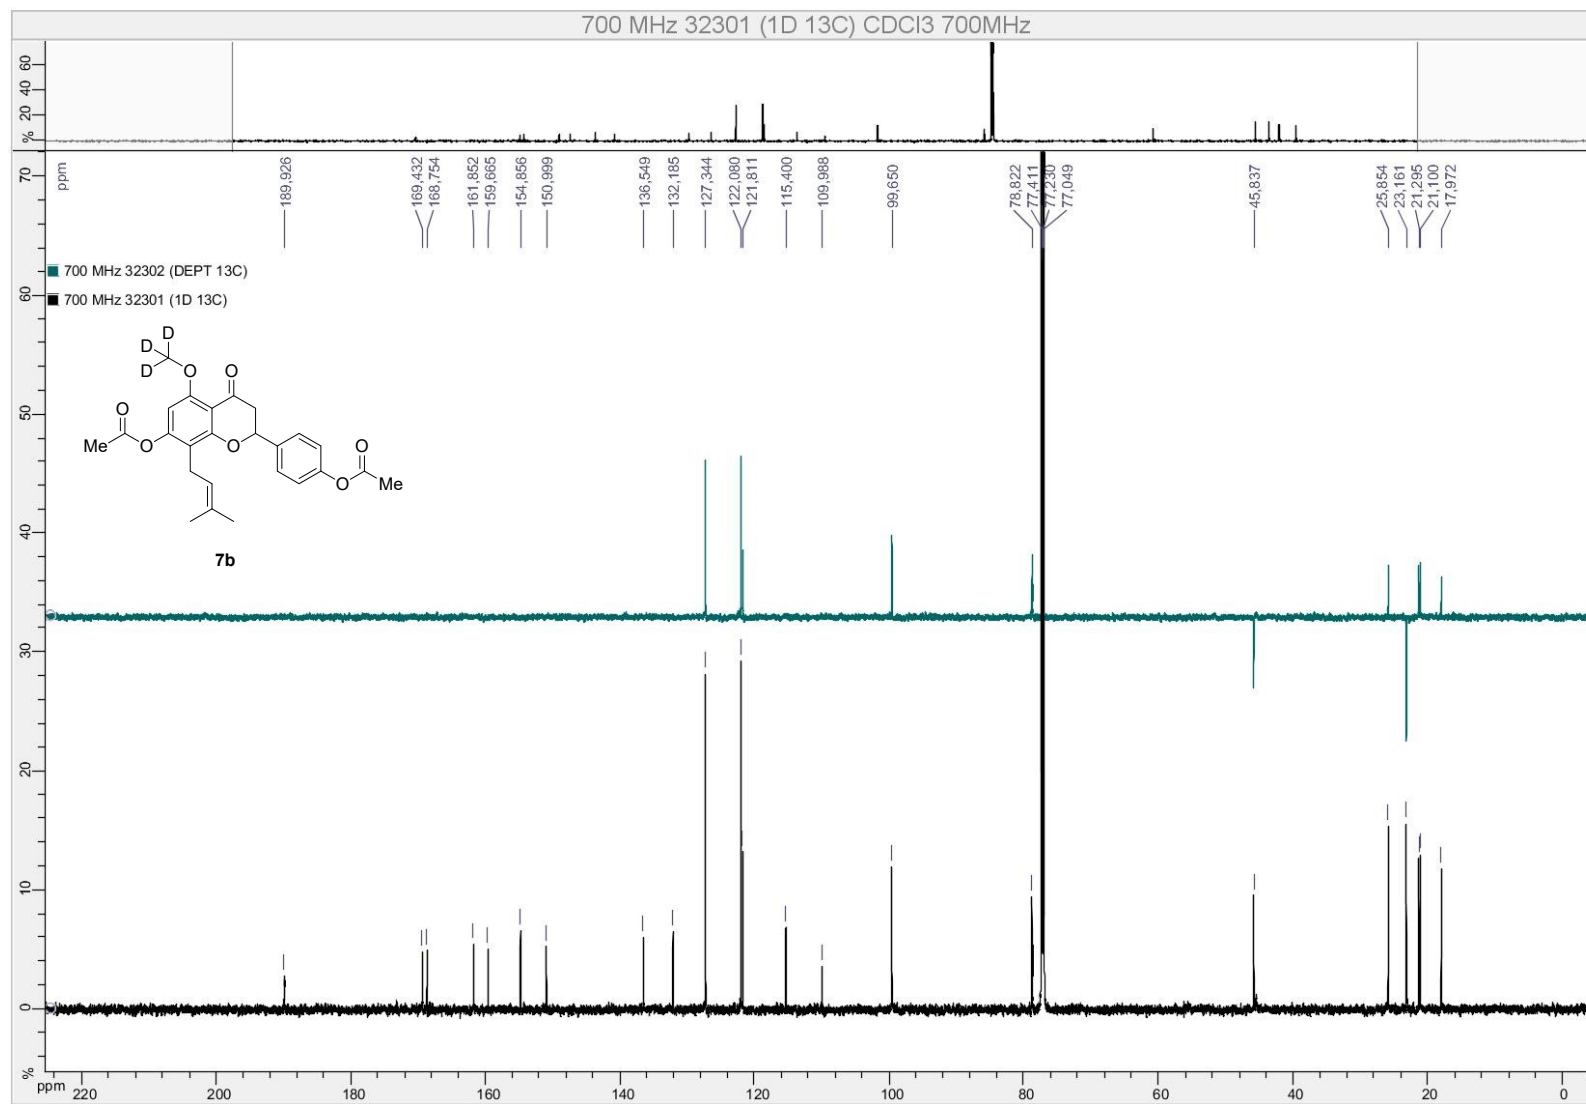

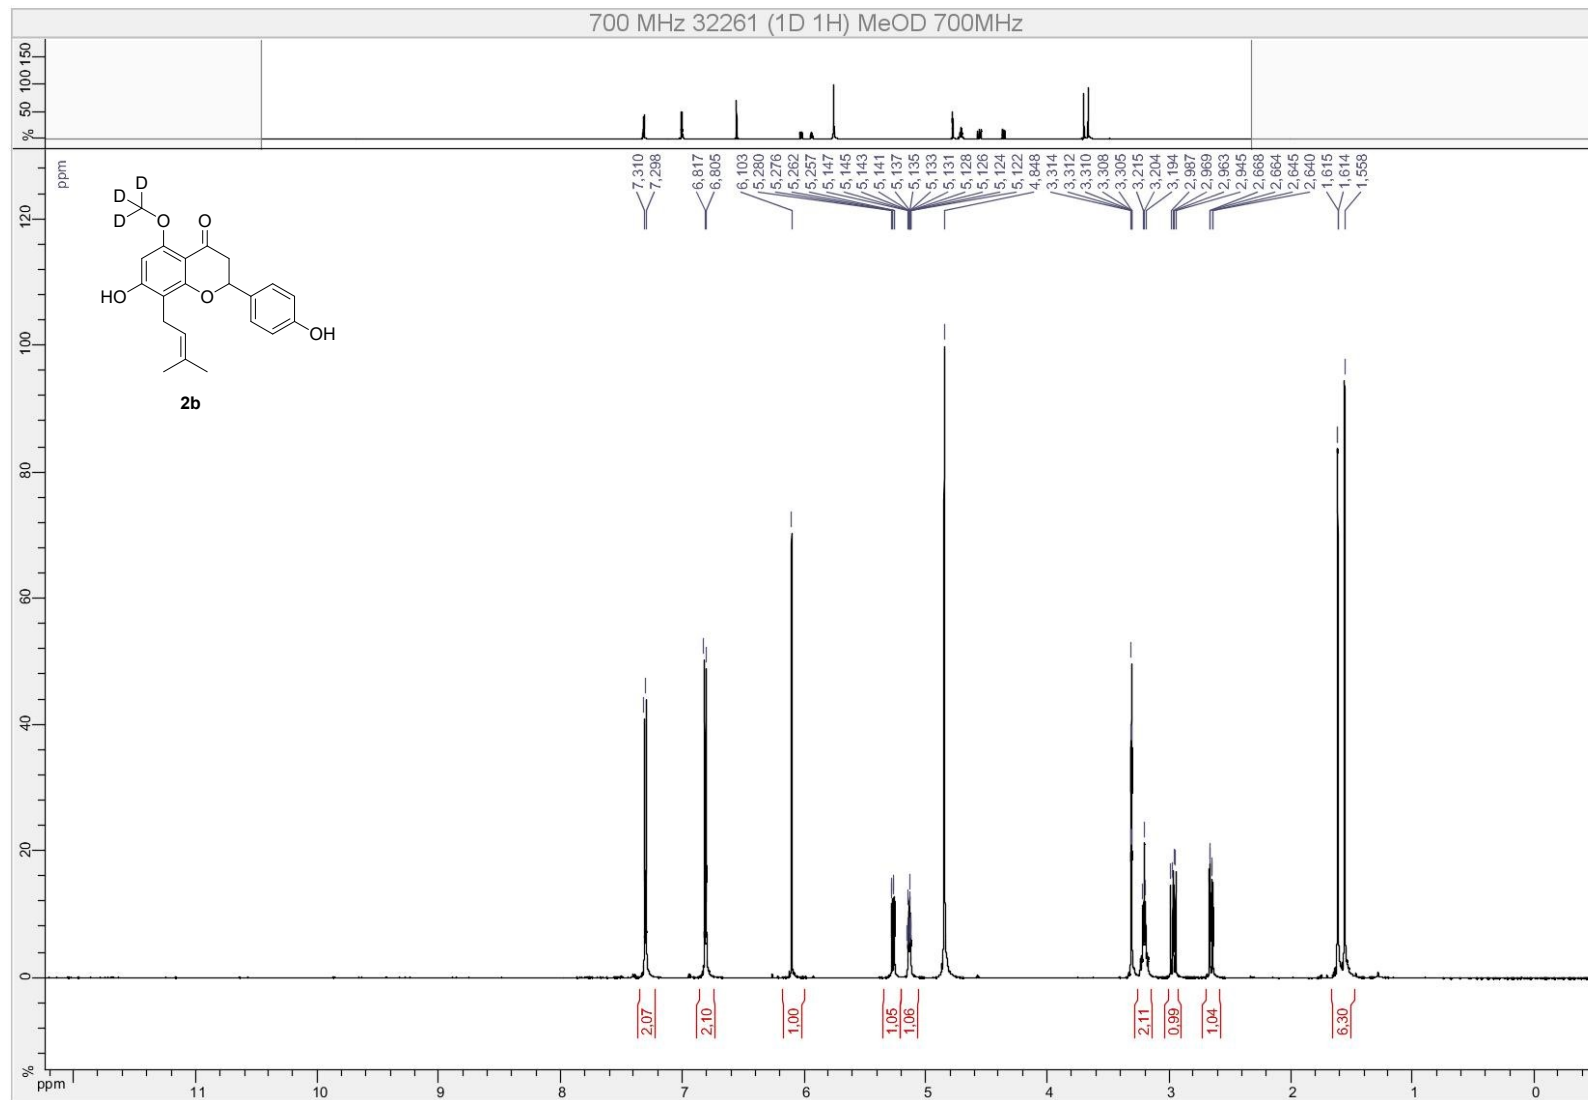

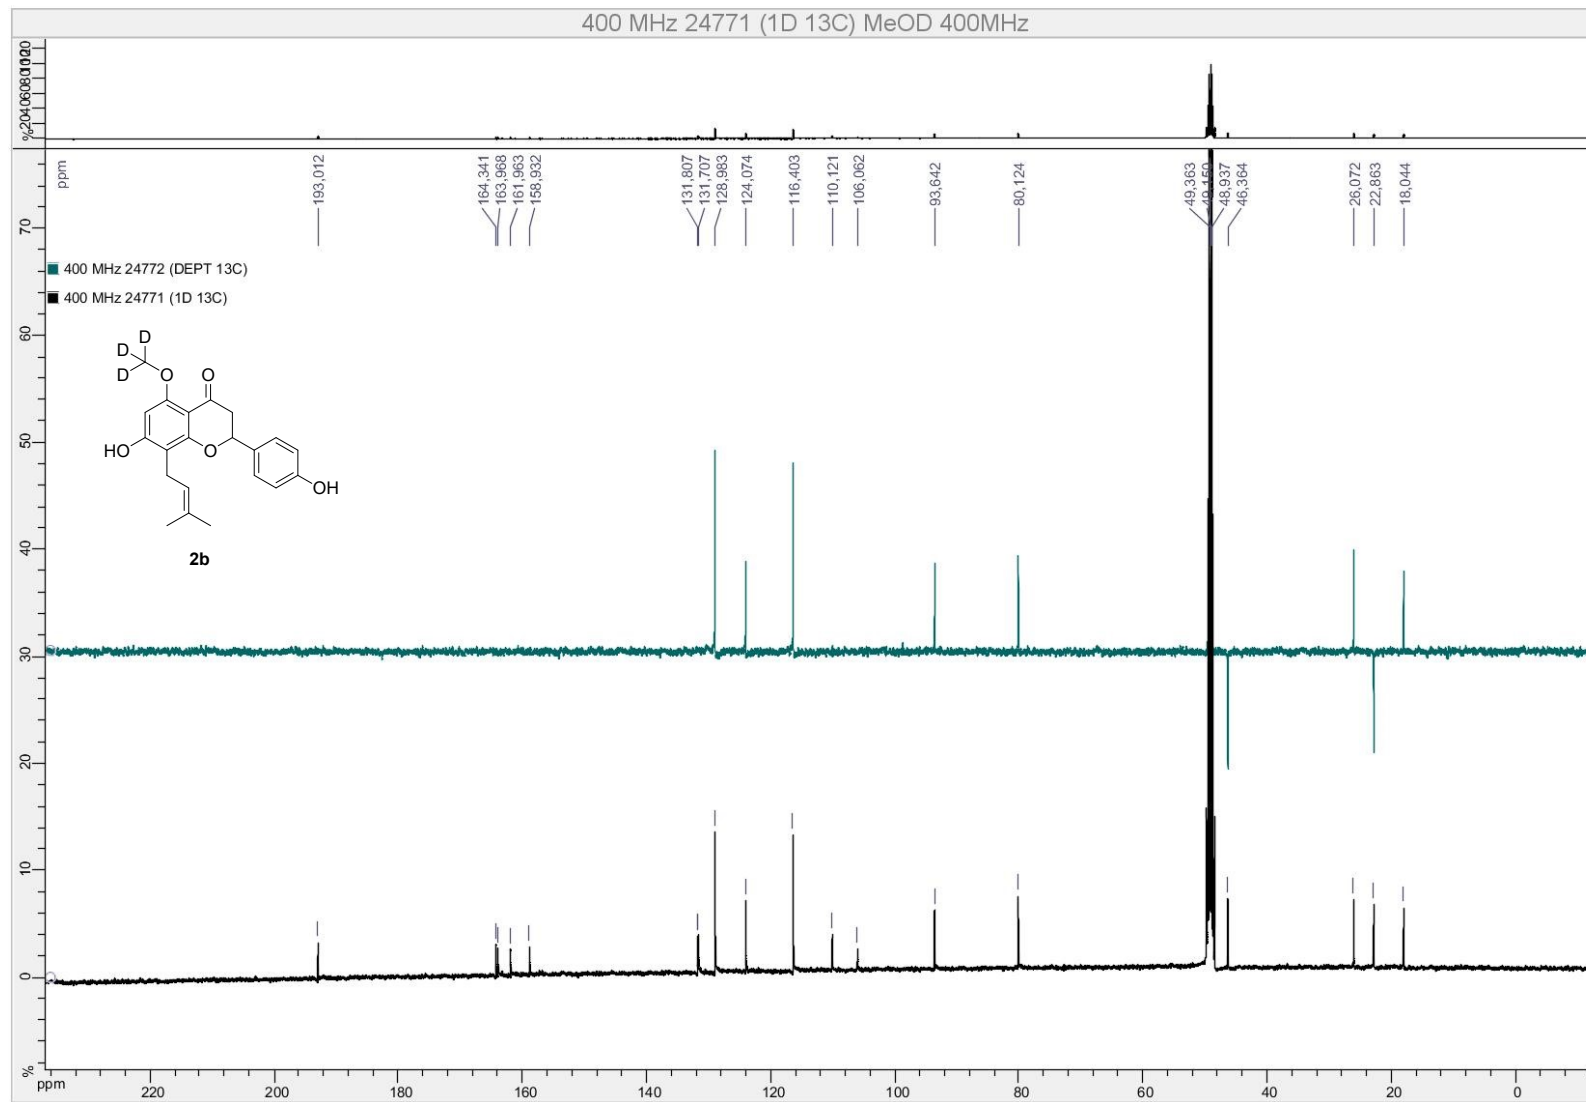

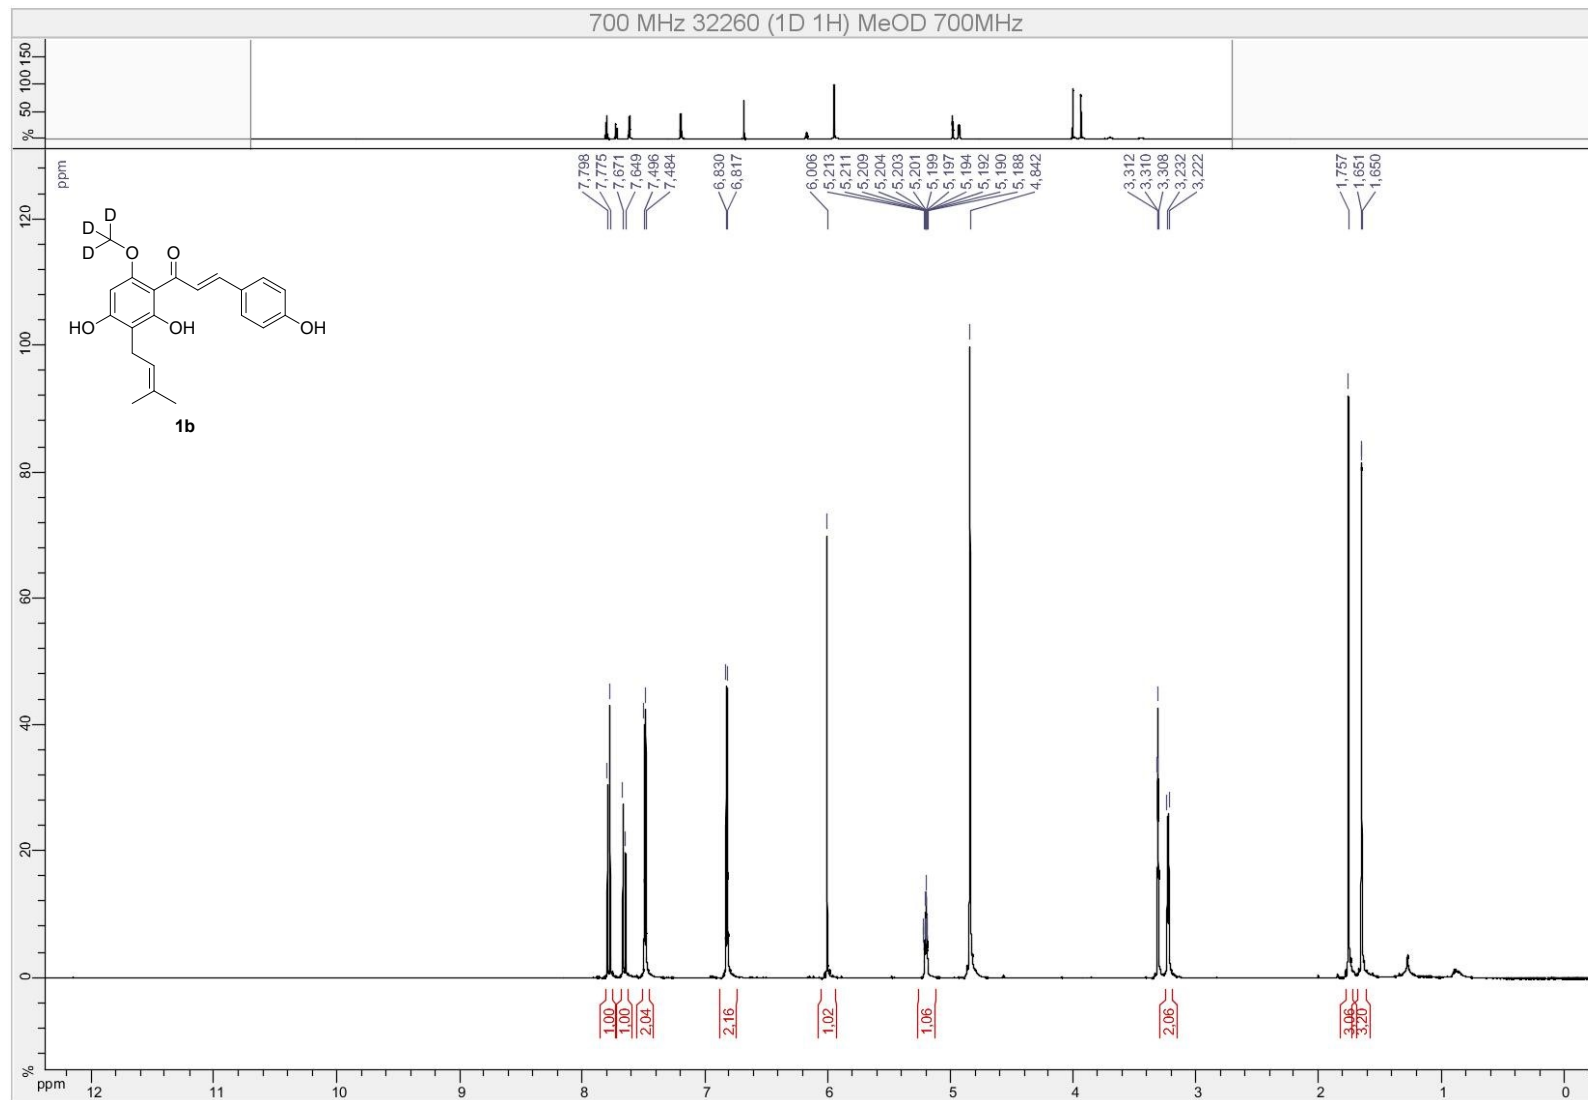

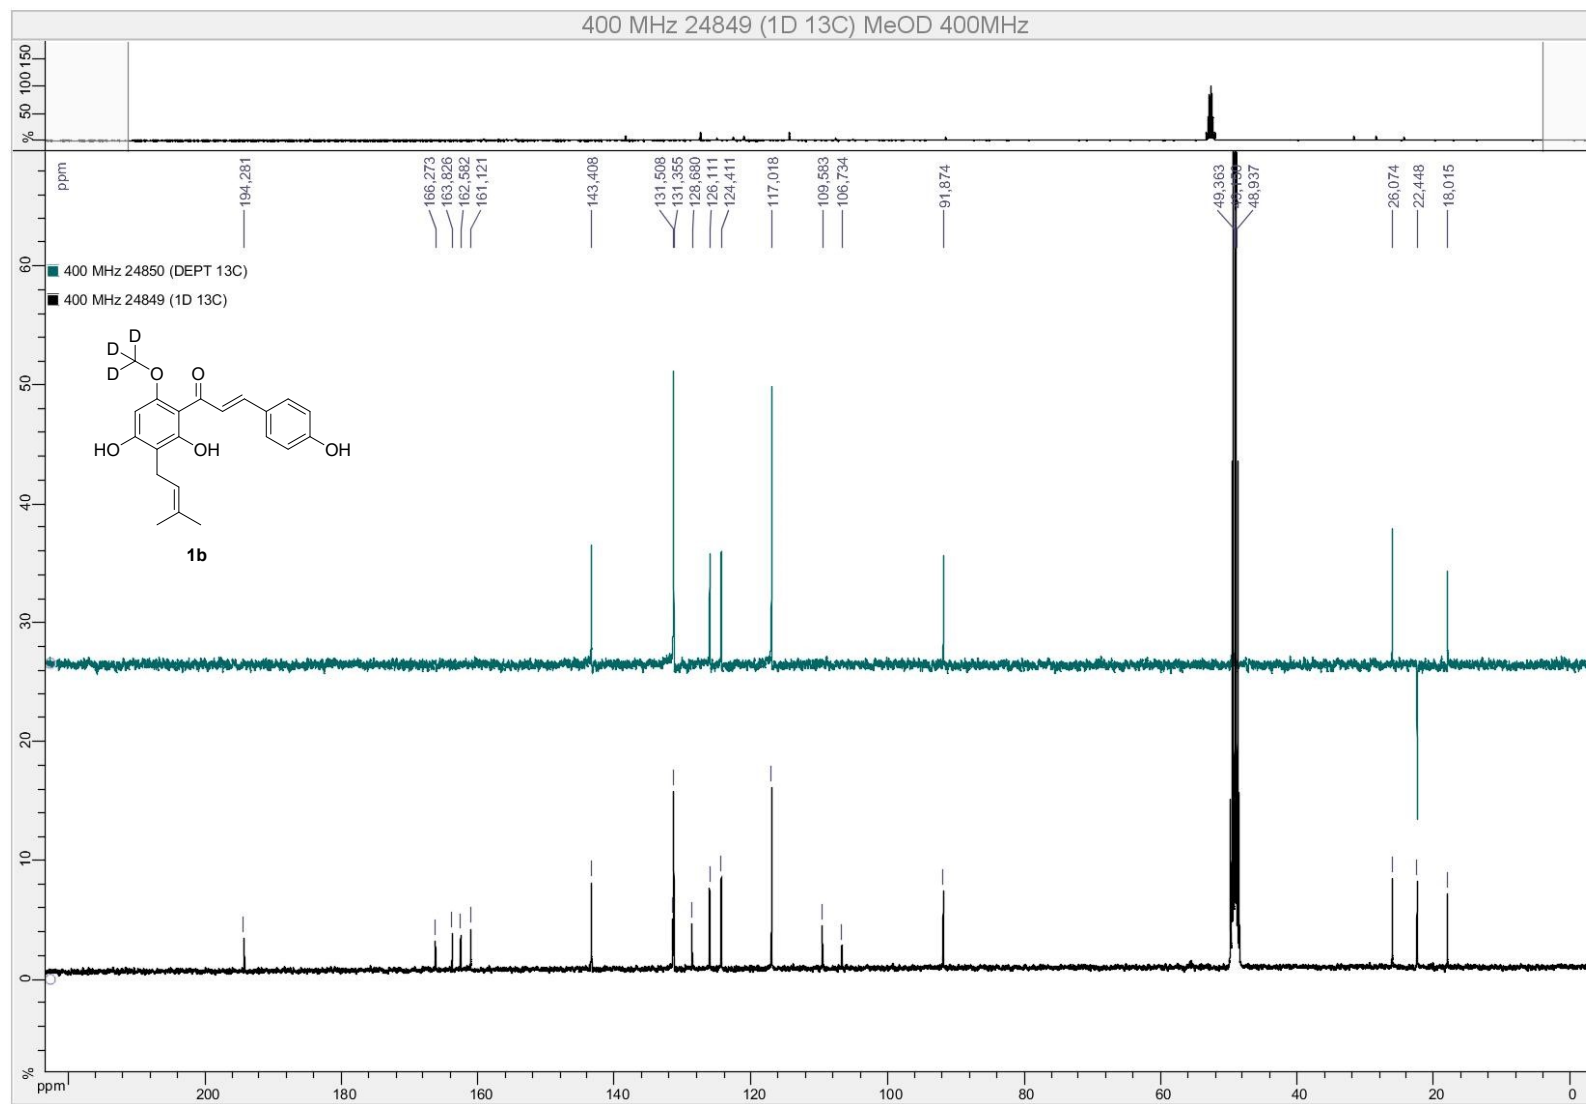

Supplement: d1ra05443k1.pdf [file d1ra05443k1.pdf]
